# Supplementary material for: Prediction of the Sleep Apnea Severity Using 2D-Convolutional Neural Networks and Respiratory Effort Signals
Source: MDPI journal article supplement (doi:10.3390/diagnostics13203187), 2023-10-12
Supplement: s1 [file s1]

| SHHS1 – Global AHI |                | CNN-AHI <sub>Global</sub> |            |                |              |
|--------------------|----------------|---------------------------|------------|----------------|--------------|
|                    |                | No apnea                  | Mild apnea | Moderate apnea | Severe apnea |
| PSG                | No apnea       | 8                         | 46         | 3              | 0            |
|                    | Mild apnea     | 16                        | 340        | 166            | 4            |
|                    | Moderate apnea | 3                         | 243        | 604            | 101          |
|                    | Severe apnea   | 2                         | 70         | 357            | 537          |

Table S1. Confusion matrix obtained by the CNN model for the severity prediction from the global AHI (CNN-AHI<sub>Global</sub>) in the SHHS1 set.

| SHHS2 – Global AHI |                | CNN-AHI <sub>Global</sub> |            |                |              |
|--------------------|----------------|---------------------------|------------|----------------|--------------|
|                    |                | No apnea                  | Mild apnea | Moderate apnea | Severe apnea |
| PSG                | No apnea       | 34                        | 150        | 8              | 1            |
|                    | Mild apnea     | 21                        | 561        | 435            | 29           |
|                    | Moderate apnea | 1                         | 44         | 498            | 337          |
|                    | Severe apnea   | 0                         | 0          | 19             | 362          |

Table S2. Confusion matrix obtained by the CNN model for the severity prediction from the global AHI (CNN-AHI<sub>Global</sub>) in the SHHS2 set.

| SHHS1 – Central AHI |                | CNN-AHI <sub>Central</sub> |            |                |
|---------------------|----------------|----------------------------|------------|----------------|
|                     |                | No apnea                   | Mild apnea | Moderate apnea |
| PSG                 | No apnea       | 2448                       | 16         | 0              |
|                     | Mild apnea     | 12                         | 16         | 0              |
|                     | Moderate apnea | 1                          | 6          | 1              |

Table S3. Confusion matrix obtained by the CNN model for the severity prediction from the central AHI (CNN-AHI<sub>Central</sub>) in the SHHS1 set. No subjects with  $\geq 30$  central events/h.

| SHHS2 – Central AHI |                | CNN-AHI <sub>Central</sub> |            |                |
|---------------------|----------------|----------------------------|------------|----------------|
|                     |                | No apnea                   | Mild apnea | Moderate apnea |
| PSG                 | No apnea       | 2427                       | 13         | 0              |
|                     | Mild apnea     | 21                         | 24         | 1              |
|                     | Moderate apnea | 1                          | 4          | 9              |

Table S4. Confusion matrix obtained by the CNN model for the severity prediction from the central AHI (CNN-AHI<sub>Central</sub>) in the SHHS2 set. No subjects with  $\geq 30$  central events/h.

| SHHS1                      | AHI events/h | Se (%) | Sp (%) | Acc (%) | PPV (%) | NPV (%) | LR+    | LR-  | <i>kappa</i> | Acc <sub>4</sub> (%) |
|----------------------------|--------------|--------|--------|---------|---------|---------|--------|------|--------------|----------------------|
| CNN-AHI <sub>Global</sub>  | 5            | 99.14  | 14.04  | 97.20   | 98.02   | 27.59   | 1.15   | 0.06 | 0.3962       | 59.56                |
|                            | 15           | 83.41  | 70.33  | 80.36   | 90.24   | 56.32   | 2.81   | 0.24 |              |                      |
|                            | 30           | 55.59  | 93.16  | 78.64   | 83.64   | 76.91   | 8.12   | 0.48 |              |                      |
| CNN-AHI <sub>Central</sub> | 1            | 53.25  | 98.10  | 93.96   | 74.10   | 95.37   | 28.10  | 0.48 | 0.5271**     | 98.60**              |
|                            | 5            | 63.89  | 99.35  | 98.84   | 58.97   | 99.47   | 98.39  | 0.36 |              |                      |
|                            | 10           | 66.67  | 99.92  | 99.76   | 80.00   | 99.84   | 829.33 | 0.33 |              |                      |
|                            | 15           | 12.50  | 100.00 | 99.72   | 100.00  | 99.72   | Inf.   | 0.88 |              |                      |
|                            | 30*          | -      | -      | -       | -       | -       | -      | -    |              |                      |

Table S5. Diagnostic performance of the CNN models proposed for the prediction of the global and central AHI in the SHHS1 set (CNN-AHI<sub>Global</sub> and CNN-AHI<sub>Central</sub> respectively). \* No subjects with  $\geq 30$  central events/h. \*\* Computed for 3 classes from its confusion matrix.

| SHHS2                      | AHI events/h | Se (%) | Sp (%) | Acc (%) | PPV (%) | NPV (%) | LR+     | LR-  | <i>kappa</i> | Acc <sub>4</sub> (%) |
|----------------------------|--------------|--------|--------|---------|---------|---------|---------|------|--------------|----------------------|
| CNN-AHI <sub>Global</sub>  | 5            | 99.05  | 17.62  | 92.76   | 93.49   | 60.71   | 1.20    | 0.05 | 0.3962       | 58.20                |
|                            | 15           | 96.43  | 61.82  | 79.28   | 72.00   | 94.45   | 2.53    | 0.06 |              |                      |
|                            | 30           | 95.01  | 82.68  | 84.56   | 49.66   | 98.93   | 5.49    | 0.06 |              |                      |
| CNN-AHI <sub>Central</sub> | 1            | 66.12  | 97.29  | 94.24   | 72.65   | 96.35   | 24.44   | 0.35 | 0.6333**     | 98.40**              |
|                            | 5            | 63.33  | 99.47  | 98.60   | 74.51   | 99.10   | 118.87  | 0.37 |              |                      |
|                            | 10           | 69.57  | 99.80  | 99.52   | 76.19   | 99.72   | 344.63  | 0.31 |              |                      |
|                            | 15           | 64.29  | 99.96  | 99.76   | 90.00   | 99.80   | 1598.14 | 0.36 |              |                      |
|                            | 30*          | -      | -      | -       | -       | -       | -       | -    |              |                      |

Table S6. Diagnostic performance of the CNN models proposed for the prediction of the global and central AHI in the SHHS2 set (CNN-AHI<sub>Global</sub> and CNN-AHI<sub>Central</sub> respectively). \* No subjects with  $\geq 30$  central events/h. \*\* Computed for 3 classes from its confusion matrix.
